# Supplementary material
Source: HighWire-hosted journal article supplement (https://srh.bmj.com/content/46/4/279)

**Supplementary Table 1. Cox proportional-hazards regression analysis on women's age, serum AMH and TMNC as predictors of time to pregnancy.**

| Covariate           | b     | Exp(b) (95% confidence interval) | P     |
|---------------------|-------|----------------------------------|-------|
| Women's age (years) | -0.11 | 0.90 (0.83 – 0.98)               | 0.012 |
| Serum AMH (ng/ml)   | 0.07  | 1.07 (0.97 – 1.17)               | 0.160 |
| TMNC (million)      | 0.03  | 1.03 (1.00 – 1.07)               | 0.067 |

Supplementary Figure 1. Survival curve showing conception probability with time.

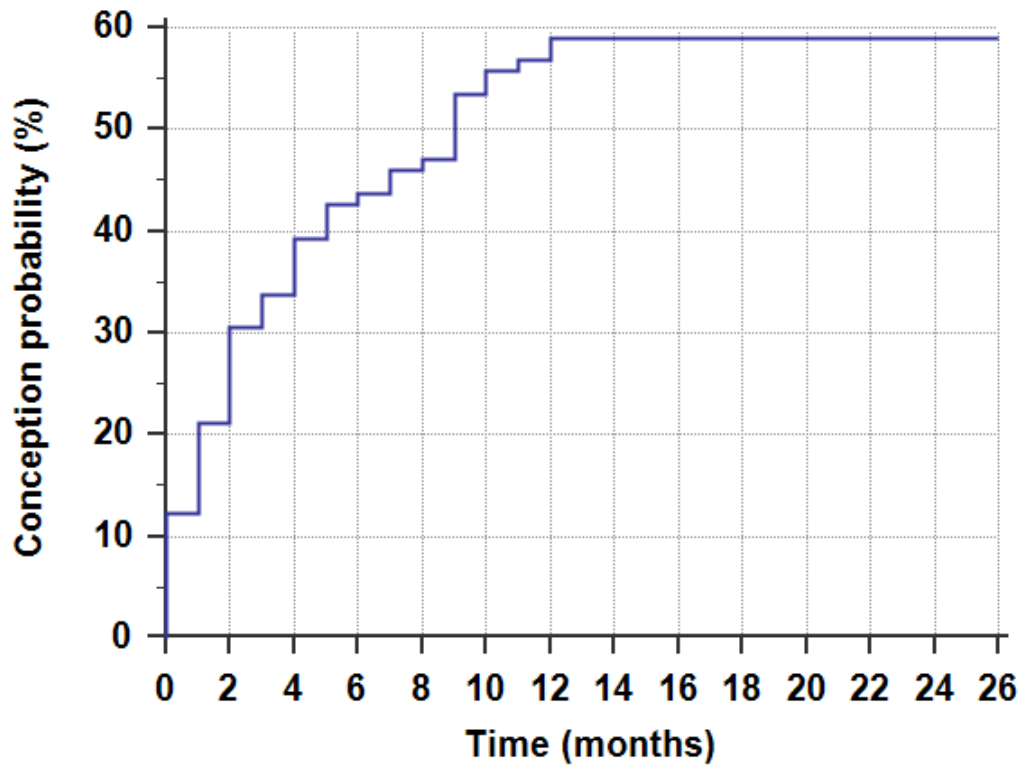

Supplement: inline-supplementary-material-1 [file inline-supplementary-material-1.pdf]
